# Supplementary material
Source: publisher figshare collection journal article supplement (https://gsapubs.figshare.com/ndownloader/files/23294375)
Supplement: Supplementary file 1 [file 23294375]

## SUPPLEMENTARY INFORMATION

## Methods

The  $\delta^{13}\text{C}$  and  $\delta^{18}\text{O}$  values were measured relative to the V-PDB standard using a VG PRISM II stable isotope mass spectrometer equipped with a common acid bath acidification system. A calcite standard (ULTISS) was used to monitor precision (mean = 1.73‰, standard deviation = 0.24‰). For [CAS] measurements, approximately 1.5 mg of micro-drilled powdered sample was acidified with 1 ml of 10% nitric acid and analyzed with a JY Ultima-C ICP-AES with Polychromometer. A repeat measurement of a standard solution gave an error of 0.6‰.

Table DR1. Measured Values

| Sample        | $\delta^{13}\text{C}$ | $\delta^{18}\text{O}$ | S (ppm) |
|---------------|-----------------------|-----------------------|---------|
| BBR-B8 (top)  | -7.597                | -6.329                | 1059.71 |
| BBR-B7        | -7.131                | -6.339                | 1356.98 |
| BBR-B6        | -6.762                | -6.277                | 1469.36 |
| BBR-B5        | -6.372                | -6.466                | 1561.84 |
| BBR-B4        | -5.955                | -6.704                | 782.54  |
| BBR-B3        | -5.195                | -6.553                | 997.40  |
| BBR-B2        | -4.352                | -6.357                | 2045.21 |
| BBR-B1 (base) | -3.664                | -5.936                | 2203.72 |

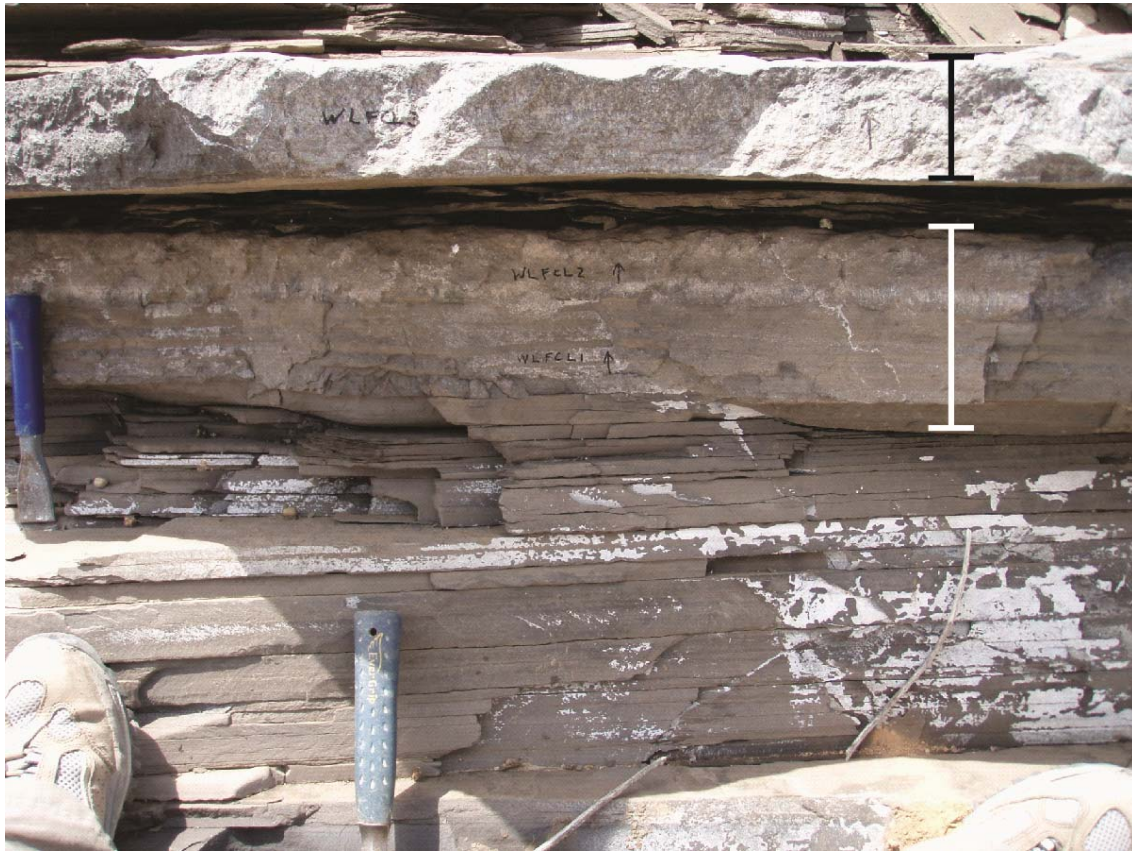

Figure DR1. Field photograph of formerly-aragonite fan layers from Williston Lake; one thick fan bed (black bar) and a fan bed-bearing interval (white bar). Chisel for scale.

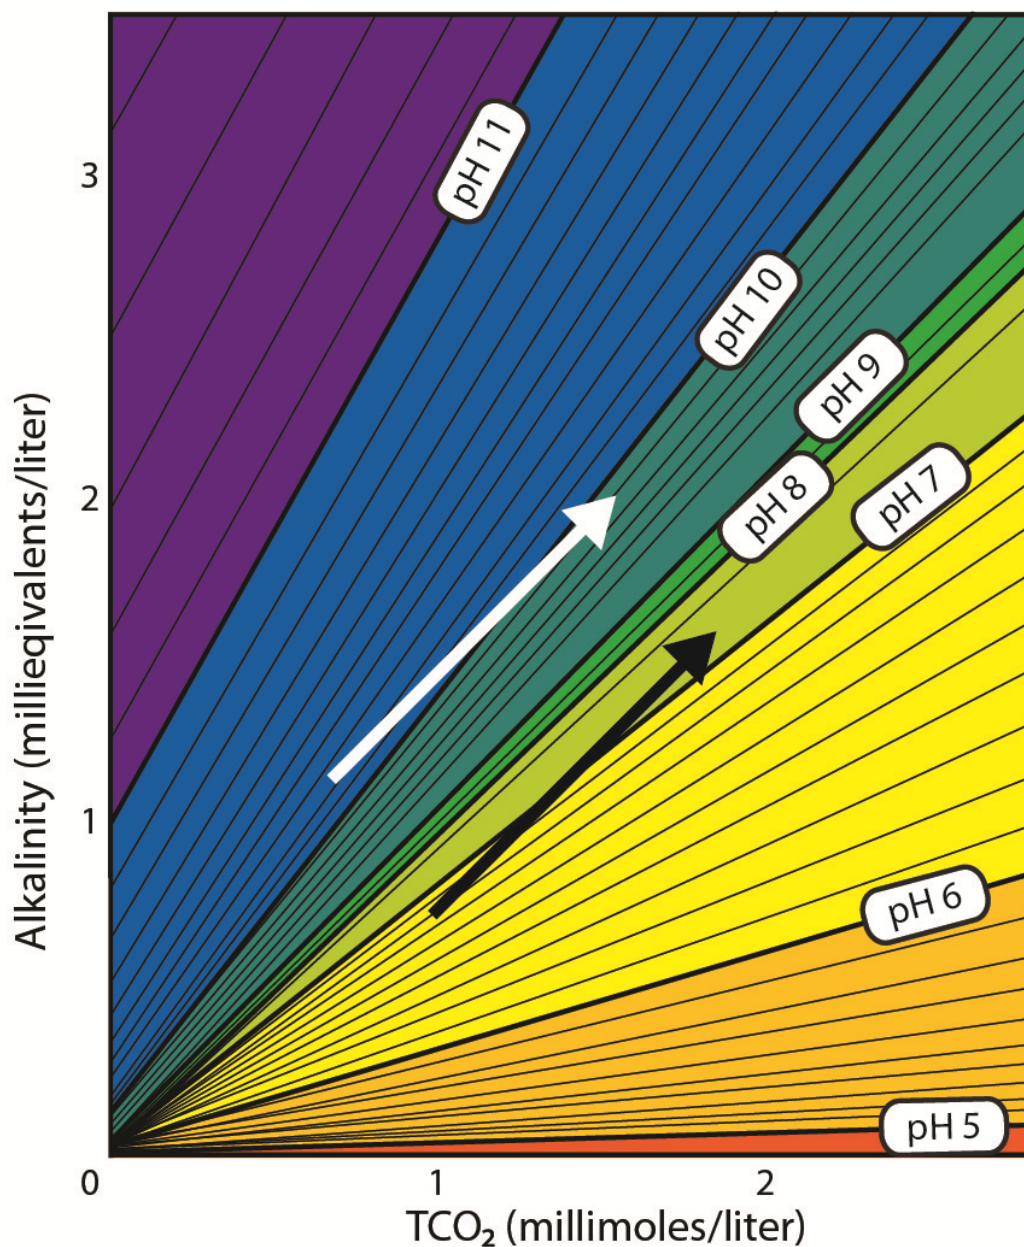

Figure DR2. pH space as a function of alkalinity and TCO<sub>2</sub> demonstrating the effect of sulfate reduction on pH. Radiating lines are lines of equal pH. Although sulfate reduction in a closed system will always increase the overall alkalinity of the system, it is not always beneficial for carbonate production. Sulfate reduction yields bicarbonate (HCO<sub>3</sub><sup>-</sup>) as a byproduct:  $\text{SO}_4^{2-} + 2\text{CH}_2\text{O} \rightarrow 2\text{HCO}_3^- + \text{H}_2\text{S}$ . Bicarbonate is a component of both alkalinity and TCO<sub>2</sub>, thus sulfate reduction changes porewater pH along a 1:1 slope in the fan diagram (see arrows). Adding bicarbonate into a pore space will raise the pH (promote precipitation of calcium carbonate) if the initial pH is low (black arrow). When initial pH is high, sulfate reduction in a pore space will actually decrease pH (inhibit precipitation of calcium carbonate) (white arrow).

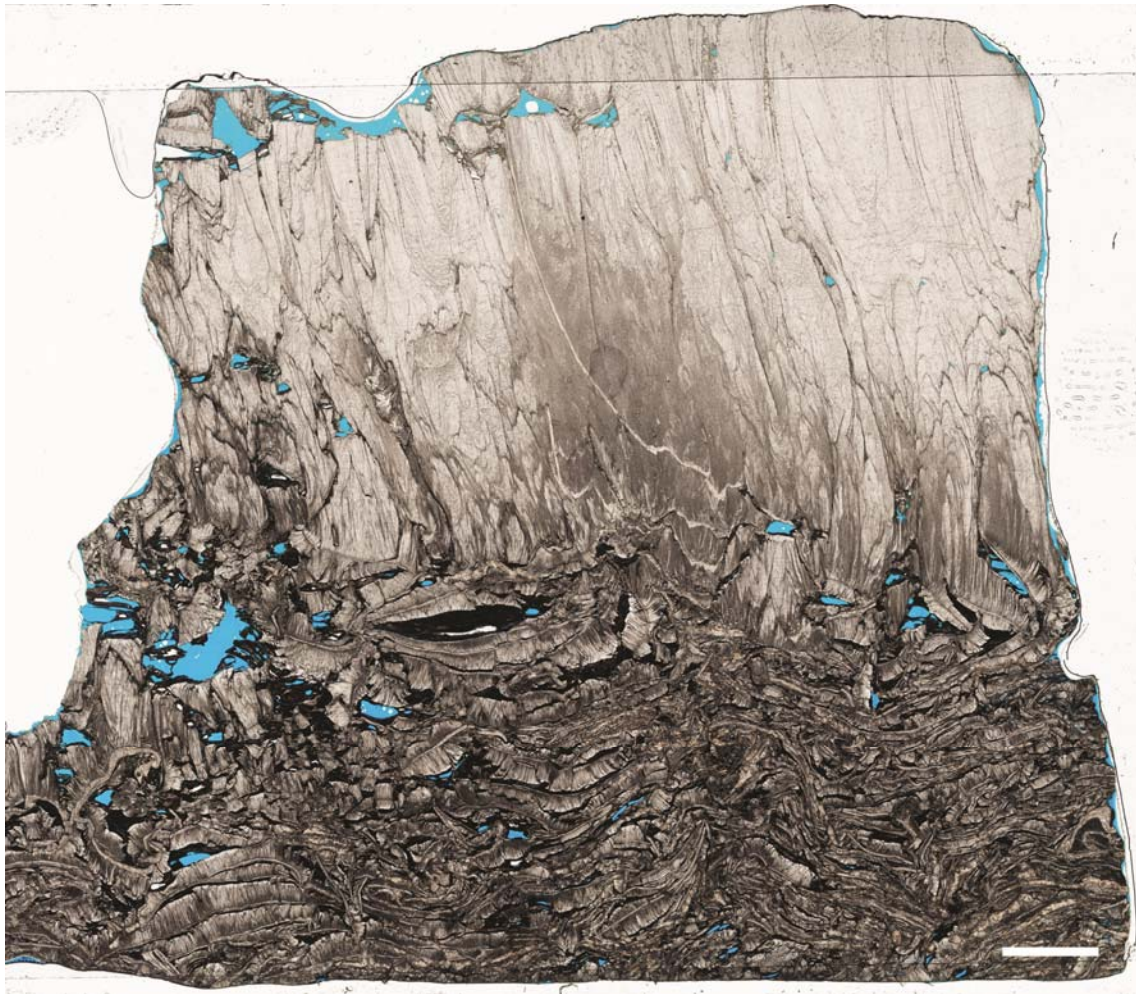

Figure DR3. Enlarged version of Figure 1E in text; scale 5mm.
